# Supplementary material
Source: PubMed Central journal article supplement (PMC7232676)

## Supplementary information

### Fragment-based design of *Mycobacterium tuberculosis* InhA inhibitors.

*Mohamad Sabbah\**<sup>||,a</sup>, *Vitor Mendes*<sup>||,b</sup>, *Robert G. Vistal*<sup>a</sup>, *David M. G. Dias*<sup>a</sup>, *Monika Záhorszská*<sup>c</sup>, *Katarína Mikušová*<sup>c</sup>, *Jana Korduláková*<sup>c</sup>, *Anthony G. Coyne*<sup>a</sup>, *Tom L. Blundell*<sup>b</sup> and *Chris Abell\**<sup>a</sup>

<sup>a</sup> Department of Chemistry, University of Cambridge, Lensfield Road, Cambridge, CB2 1EW, United Kingdom.

<sup>b</sup> Department of Biochemistry, University of Cambridge, 80 Tennis Court Road, Cambridge, CB2 1GA, United Kingdom.

<sup>c</sup> Department of Biochemistry, Faculty of Natural Sciences, Comenius University in Bratislava, Mlynská dolina, Ilkovičova 6, 84215, Bratislava, Slovakia

|                                                                                                                                         |        |
|-----------------------------------------------------------------------------------------------------------------------------------------|--------|
| <b>Table S1:</b> Fragment hits identified by thermal shift                                                                              | S2-5   |
| <b>Table S2:</b> X-ray crystallography data collection and final refinement statistics                                                  | S6-7   |
| <b>Figure S1:</b> Fo-Fc “Omit” map of compounds <b>1</b> (A), <b>2</b> (B), <b>3</b> (C), <b>4</b> (D), <b>5</b> (E) and <b>23</b> (F). | S8     |
| <b>Figure S2:</b> X-ray crystal structures of the fragment hits showing interaction maps between ligand and InhA-NAD <sup>+</sup> .     | S9     |
| <b>Figure S3:</b> Docking poses of compound <b>23</b> (a) and <b>24</b> (b)                                                             | S10    |
| <b>Figure S4:</b> LCMS data for the compounds screened against InhA                                                                     | S11-17 |

**Table S1:** Fragment hits identified by thermal shift.

|            | Chemical Structure                                                                  | $\Delta T_m$ ( $^{\circ}\text{C}$ ) | Confirmed by ligand-based NMR* | X-ray crystal structure |
|------------|-------------------------------------------------------------------------------------|-------------------------------------|--------------------------------|-------------------------|
| Fragment 1 | 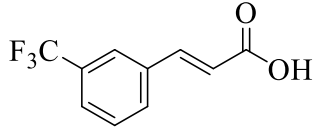   | + 3.2                               | Yes                            | Yes                     |
| Fragment 2 |    | + 4.2                               | Yes                            | Yes                     |
| Fragment 3 |    | + 4.2                               | Yes                            | Yes                     |
| Fragment 4 |    | + 3.0                               | Yes                            | Yes                     |
| Fragment 5 |   | + 6.0                               | Yes                            | Yes                     |
|            |  | + 3.8                               | Yes                            | No                      |
|            |  | + 4.1                               | No                             | No                      |
|            |  | + 3.4                               | Yes                            | No                      |
|            |  | + 6.8                               | No                             | No                      |
|            |  | + 6.4                               | No                             | No                      |

|                                                                                     |       |     |    |
|-------------------------------------------------------------------------------------|-------|-----|----|
| 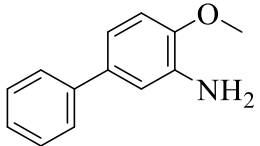   | + 3.4 | No  | No |
|    | + 3.4 | No  | No |
|    | + 3.0 | No  | No |
|    | + 3.4 | No  | No |
|    | + 5.8 | Yes | No |
|   | + 3.1 | Yes | No |
|  | + 6.1 | Yes | No |
|  | + 3.2 | Yes | No |
|  | + 4.6 | Yes | No |
|  | + 8.3 | No  | No |
|  | + 8.0 | No  | No |

|  |                                                                                     |       |     |    |
|--|-------------------------------------------------------------------------------------|-------|-----|----|
|  | 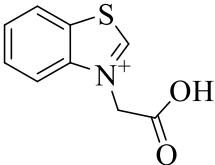   | + 8.7 | No  | No |
|  |    | + 9.0 | Yes | No |
|  |    | + 4.3 | Yes | No |
|  |    | + 4.3 | No  | No |
|  |    | + 6.0 | No  | No |
|  |   | + 5.2 | Yes | No |
|  |  | + 4.9 | Yes | No |
|  |  | + 3.2 | No  | No |
|  |  | + 6.2 | Yes | No |
|  |  | + 3.2 | No  | No |
|  |  | + 3.4 | Yes | No |

|                                                                                     |        |    |    |
|-------------------------------------------------------------------------------------|--------|----|----|
| 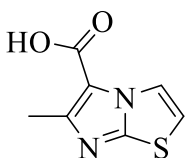   | + 4.1  | No | No |
|    | + 11.0 | No | No |
|    | + 4.5  | No | No |
|    | + 9.7  | No | No |
|    | + 9.7  | No | No |
|   | + 3.3  | No | No |
|  | + 3.6  | No | No |
|  | + 10.4 | No | No |
|  | + 6.0  | No | No |
|  | + 3.3  | No | No |

\*Fragments were only considered confirmed hits by NMR if they showed interactions with InhA in at least two ligand-based NMR techniques (CMPG, STD and WaterLOGSY)

**Table S2:** X-ray crystallography data collection and final refinement statistics

| Ligand#                               | Fragment 1                     | Fragment 2                    | Fragment 3                    |
|---------------------------------------|--------------------------------|-------------------------------|-------------------------------|
| PDB ID                                | 6SQ5                           | 6SQ7                          | 6SQ9                          |
| <b>Data collection*</b>               |                                |                               |                               |
| Space group                           | <i>P6<sub>2</sub>22</i>        | <i>P6<sub>2</sub>22</i>       | <i>P6<sub>2</sub>22</i>       |
| Cell parameters:                      |                                |                               |                               |
| a [Å]                                 | 97.53                          | 97.52                         | 97.40                         |
| b [Å]                                 | 97.53                          | 97.52                         | 97.40                         |
| c [Å]                                 | 140.23                         | 140.18                        | 140.69                        |
| $\alpha/\beta/\gamma$ [°]             | 90/90/120                      | 90/90/120                     | 90/90/120                     |
| Resolution range [Å]                  | 140.23 – 1.84<br>(2.05 – 1.84) | 84.46 – 1.76<br>(1.96 – 1.76) | 84.35 – 1.75<br>(2.02 – 1.75) |
| No. of observations                   |                                |                               |                               |
| total                                 | 680038<br>(192608)             | 762097<br>(213551)            | 1022057<br>(369232)           |
| unique                                | 35046<br>(9753)                | 39915<br>(11123)              | 40716<br>(13985)              |
| $R_{\text{merge}}$                    | 0.061 (0.952)                  | 0.065 (0.644)                 | 0.084 (0.649)                 |
| $I/\sigma(I)$                         | 26.4 (3.8)                     | 24.1 (3.8)                    | 22.7 (4.8)                    |
| CC(1/2)                               | 0.999 (0.952)                  | 0.999 (0.78)                  | 0.999 (0.987)                 |
| Completeness [%]                      | 100.0 (100.0)                  | 100.0 (100.0)                 | 100.0 (100.0)                 |
| Multiplicity                          | 19.4 (19.7)                    | 19.1 (19.2)                   | 25.1 (26.4)                   |
| <b>Refinement</b>                     |                                |                               |                               |
| Refinement program                    | PHENIX                         | PHENIX                        | PHENIX                        |
| Resolution [Å]                        | 72.35 – 1.84                   | 84.46 – 1.76                  | 84.35 – 1.75                  |
| No. reflections                       | 34995                          | 39876                         | 40667                         |
| $R_{\text{work}}/R_{\text{free}}$ [%] | 16.3/18.2                      | 15.6/16.4                     | 16.8/17.9                     |
| RMS deviations                        |                                |                               |                               |
| Bonds [Å]                             | 0.006                          | 0.006                         | 0.006                         |
| Angles [°]                            | 0.826                          | 0.947                         | 0.880                         |
| Ramachandran                          |                                |                               |                               |
| Favoured [%]                          | 96                             | 96                            | 96                            |
| Outliers [%]                          | 0                              | 0                             | 0.4                           |

\* Parameters shown in brackets are for the highest resolution shown

| Ligand#                                  | Fragment 4                  | Fragment 5                    | Compound 23                   |
|------------------------------------------|-----------------------------|-------------------------------|-------------------------------|
| PDB ID                                   | 6SQB                        | 6SQD                          | 6SQL                          |
| <b>Data collection*</b>                  |                             |                               |                               |
| Space group                              | <i>P</i> 6 <sub>2</sub> 22  | <i>P</i> 6 <sub>2</sub> 22    | <i>P</i> 6 <sub>2</sub> 22    |
| Cell parameters:                         |                             |                               |                               |
| a [Å]                                    | 97.83                       | 97.61                         | 97.92                         |
| b [Å]                                    | 97.83                       | 97.61                         | 97.92                         |
| c [Å]                                    | 140.59                      | 139.46                        | 139.95                        |
| α/β/γ [°]                                | 90/90/120                   | 90/90/120                     | 90/90/120                     |
| Resolution range [Å]                     | 84.72–1.77<br>(2.05 – 1.77) | 84.53 – 1.72<br>(1.81 – 1.72) | 84.81 – 2.35<br>(2.48 – 2.35) |
| No. of observations                      |                             |                               |                               |
| total                                    | 1025427<br>(365696)         | 804481<br>(107937)            | 311279<br>(47644)             |
| unique                                   | 39125<br>(13427)            | 42463<br>(6110)               | 16974<br>(2437)               |
| R <sub>merge</sub>                       | 0.084 (0.758)               | 0.058 (0.737)                 | 0.354 (2.238)                 |
| I/σ(I)                                   | 28.2 (4.8)                  | 24.8 (3.0)                    | 11.9 (3.8)                    |
| CC(1/2)                                  | 0.999 (0.970)               | 0.999 (0.962)                 | 0.989 (0.900)                 |
| Completeness [%]                         | 100.0 (100.0)               | 100.0 (100.0)                 | 99.0 (99.9)                   |
| Multiplicity                             | 26.2 (27.2)                 | 18.9 (17.7)                   | 18.3 (19.6)                   |
| <b>Refinement</b>                        |                             |                               |                               |
| Refinement program                       | PHENIX                      | PHENIX                        | PHENIX                        |
| Resolution [Å]                           | 84.72 – 1.77                | 84.53 – 1.72                  | 84.81 – 2.35                  |
| No. reflections                          | 39077                       | 42210                         | 17420                         |
| R <sub>work</sub> /R <sub>free</sub> [%] | 15.6/17.4                   | 16.0/18.0                     | 16.2/20.4                     |
| RMS deviations                           |                             |                               |                               |
| Bonds [Å]                                | 0.007                       | 0.007                         | 0.007                         |
| Angles [°]                               | 0.866                       | 0.907                         | 0.883                         |
| Ramachandran                             |                             |                               |                               |
| Favoured [%]                             | 96                          | 96                            | 97                            |
| Outliers [%]                             | 0                           | 0                             | 0.4                           |

\* Parameters shown in brackets are for the highest resolution shell

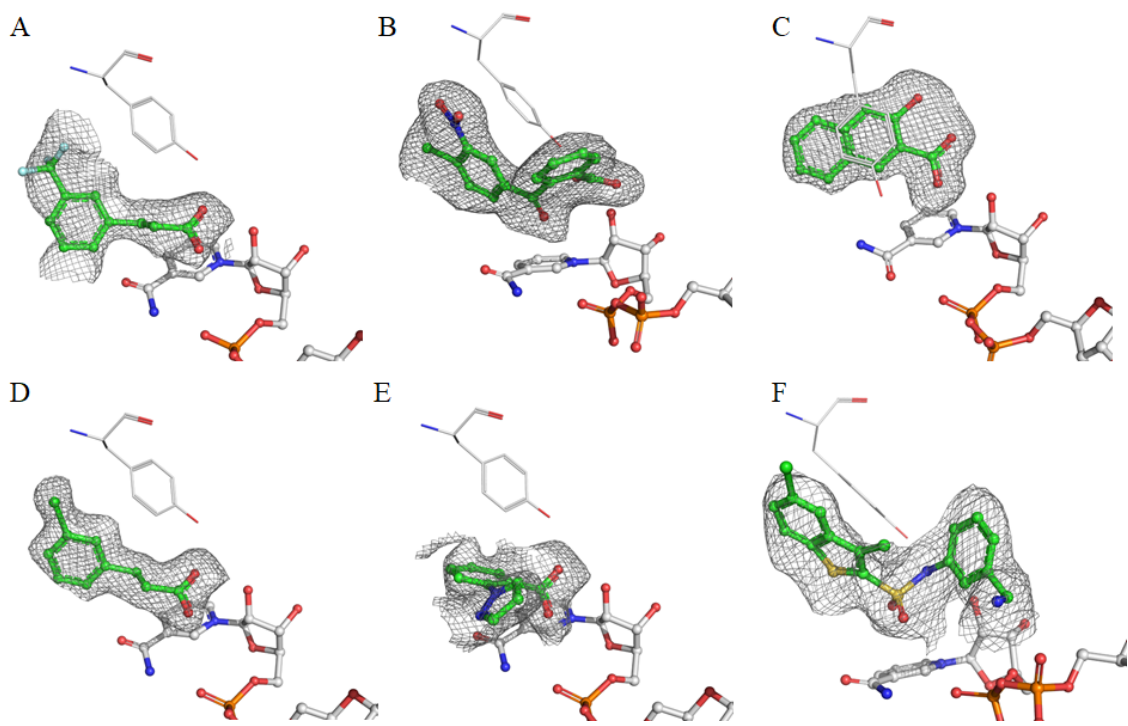

**Figure S1:** Fo-Fc “Omit” map of compounds **1** (A), **2** (B), **3** (C), **4** (D), **5** (E) and **23** (F).



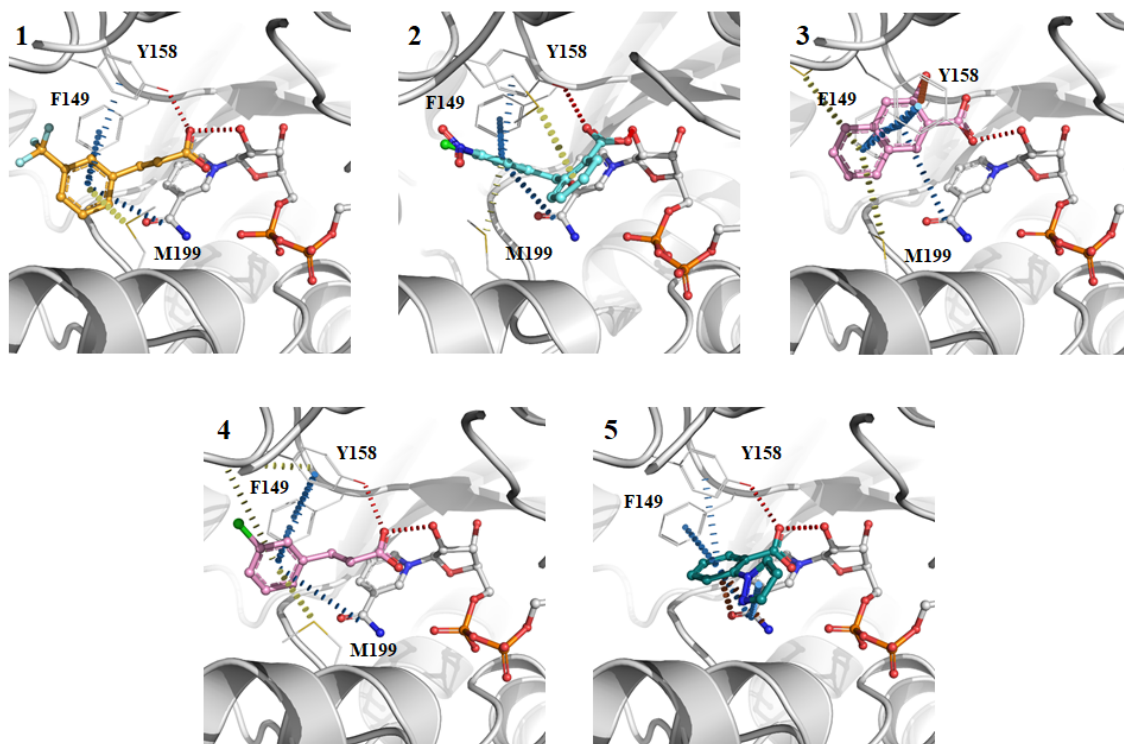

**Figure S2:** X-ray crystal structures of the fragment hits showing interaction maps between ligand and InhA-NAD<sup>+</sup>. NAD<sup>+</sup> is shown in white while each fragment is shown in a different colour. Red disks represent hydrogen bonds, blue disks depict  $\pi$ - $\pi$  interactions, yellow disks sulphur- $\pi$ , brown disks donor- $\pi$  interactions. Interactions were calculated using Intermezzo plugin for Pymol (Ochoa B., *et al.* unpublished). Carbonyl groups of fragments **1**, **4** and **5** occupy the same area of the active site. Y158 adopts an “in” conformation in all structures except for **3** where it adopts a new previously unseen conformation.

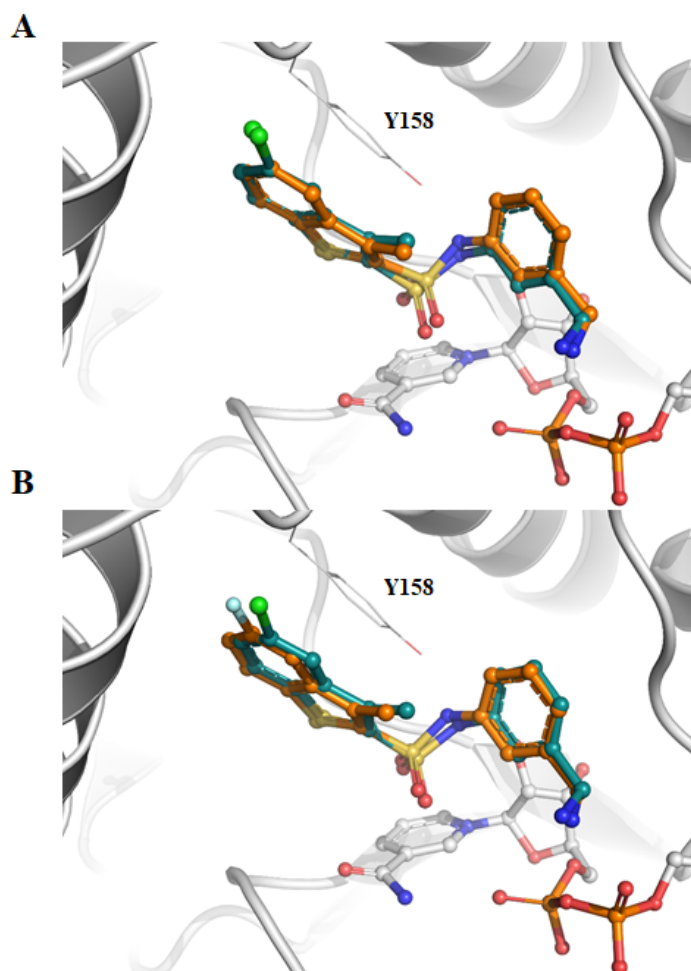

**Figure S3:** Docking poses of compound **23** (a) and **24** (b), both in orange superposed to the X-ray crystal structure of compound **23** in teal. The compounds **23** and **24** were docked into the structure for fragment **1** (PDB code 6SQ5).

**Figure S4: LCMS data for the compounds screened against InhA**

**Compound 6**

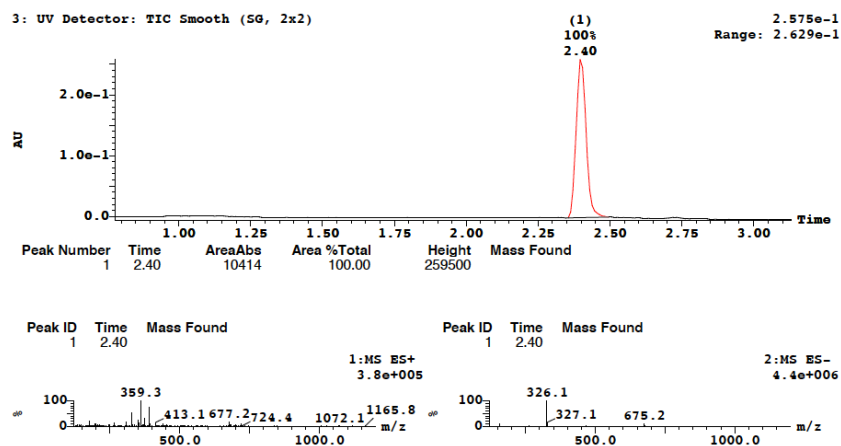

**Compound 7**

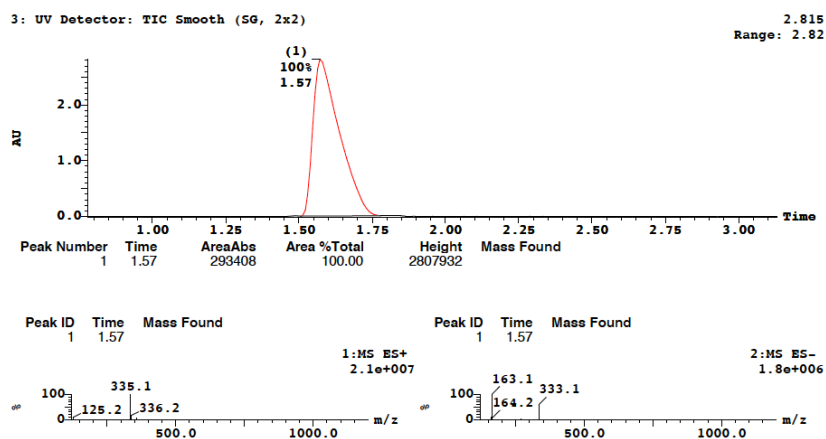

**Compound 8**

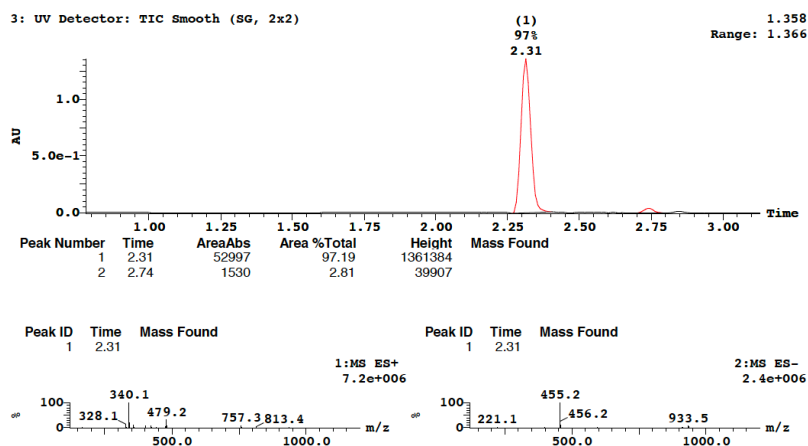

### Compound 9

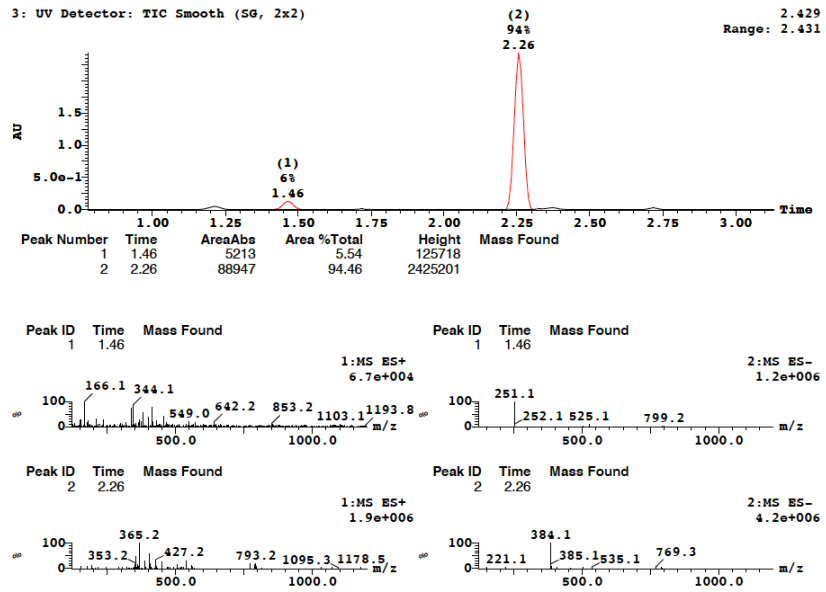

### Compound 10

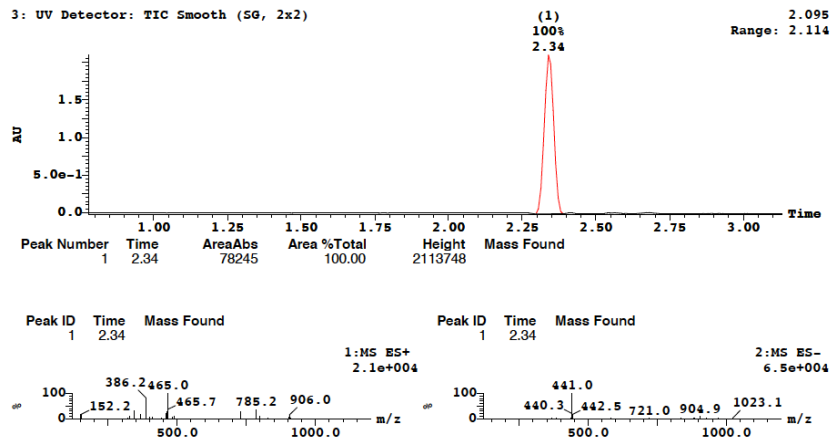

### Compound 11

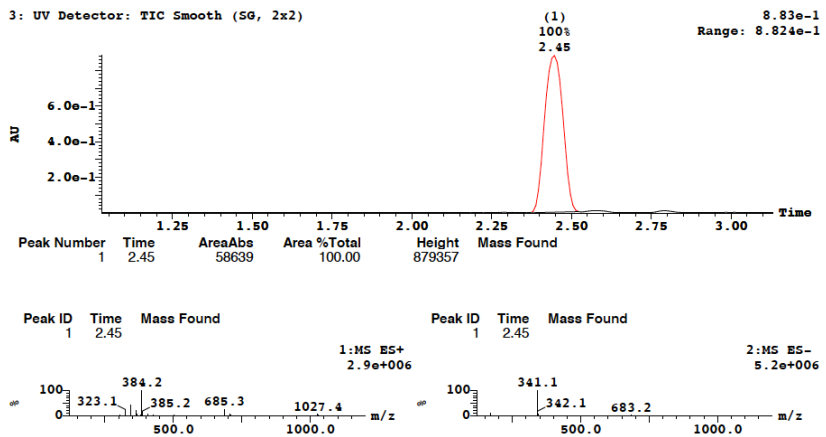

### Compound 12

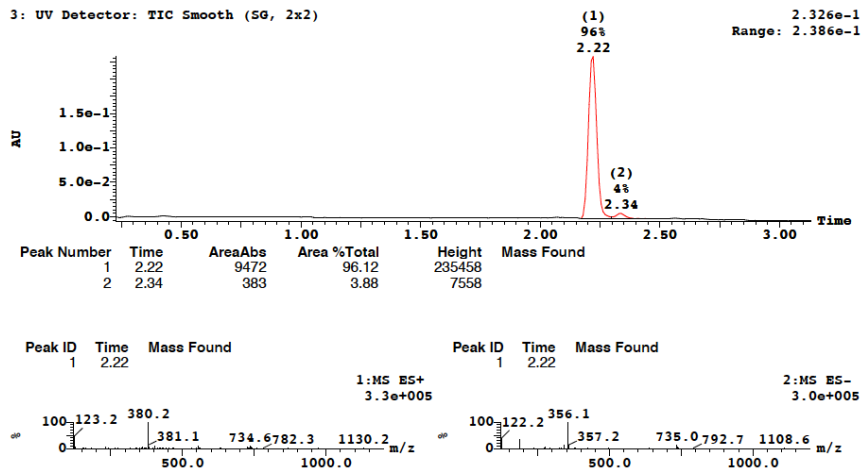

### Compound 13

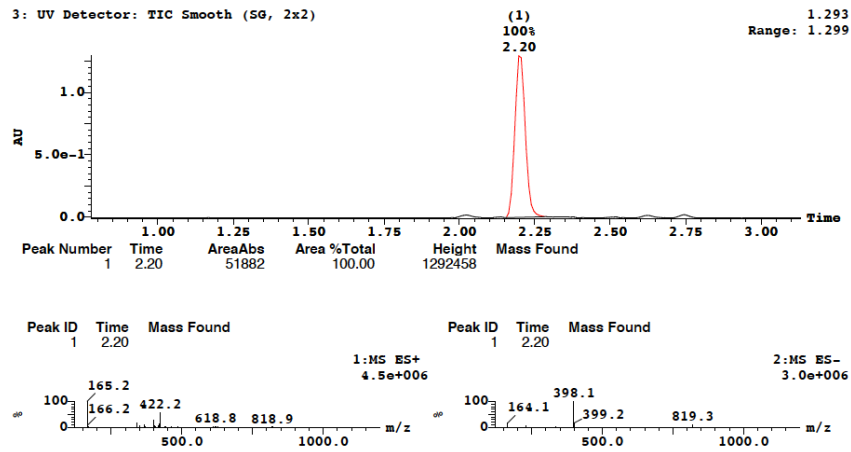

### Compound 14

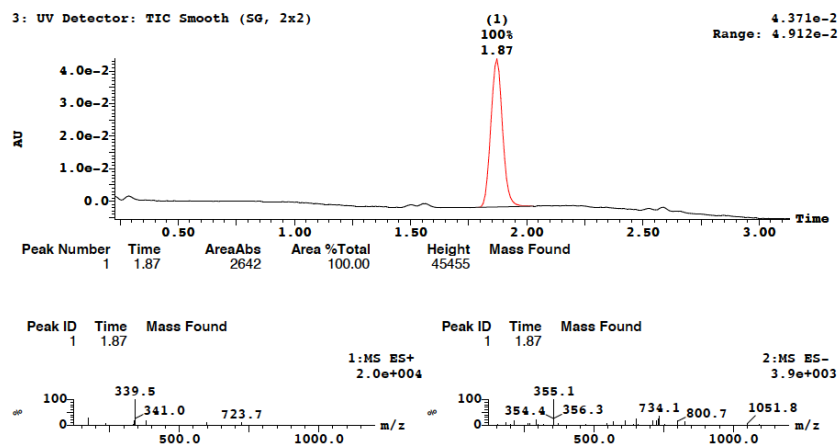

### Compound 15

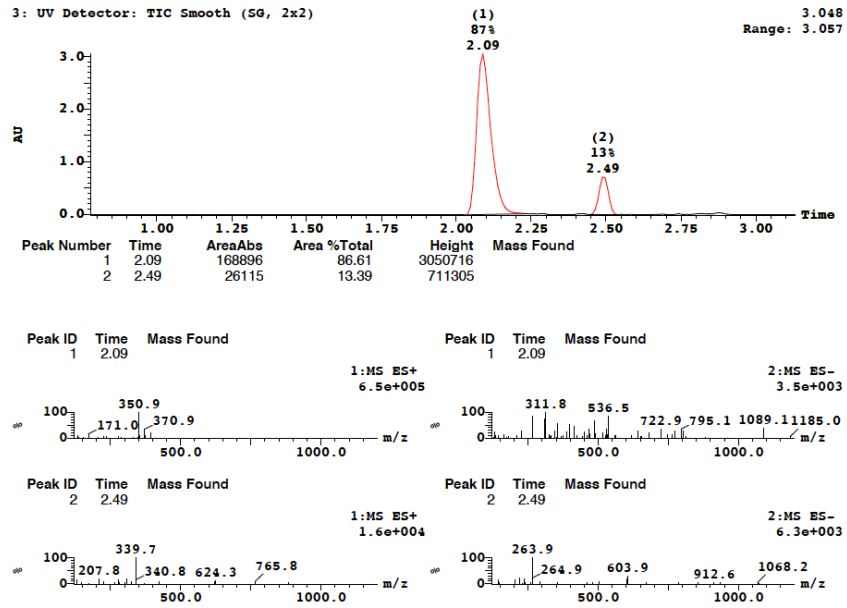

### Compound 16

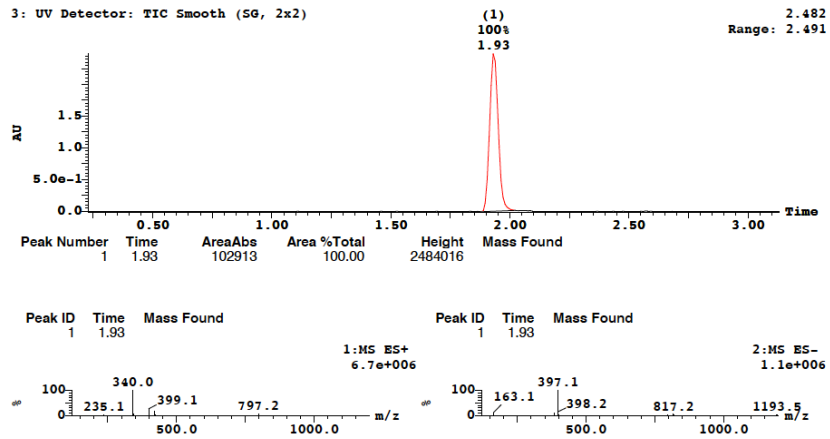

### Compound 17

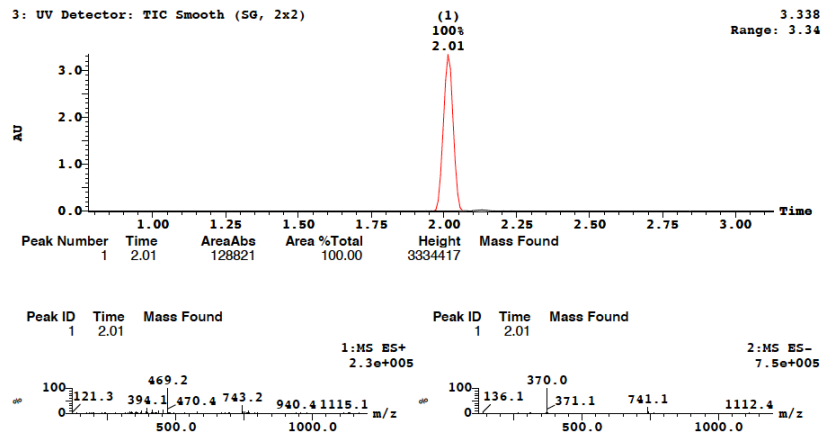

### Compound 18

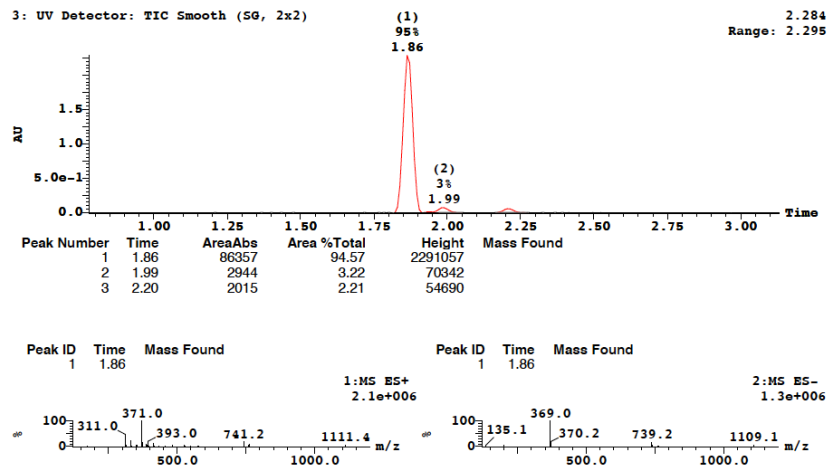

### Compound 19

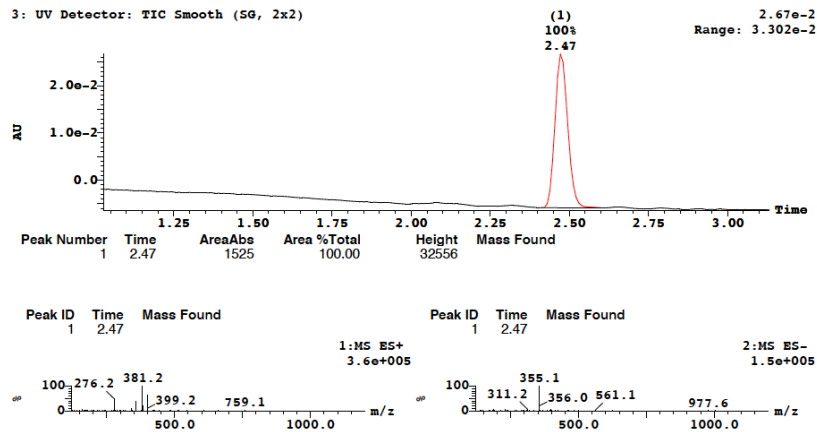

### Compound 20

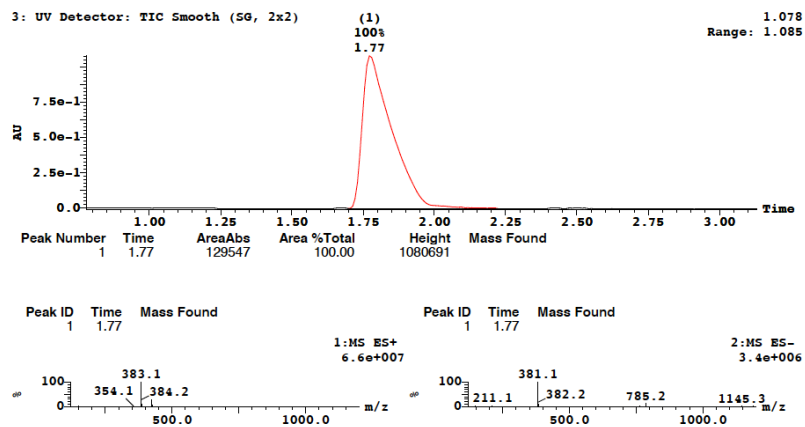

## Compound 21

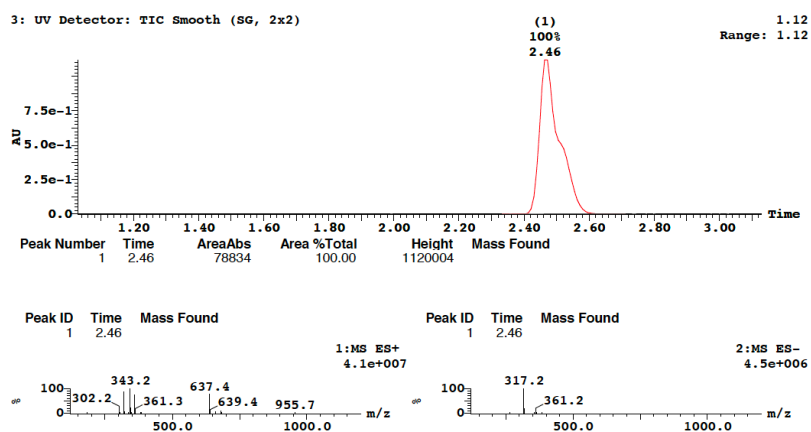

## Compound 22

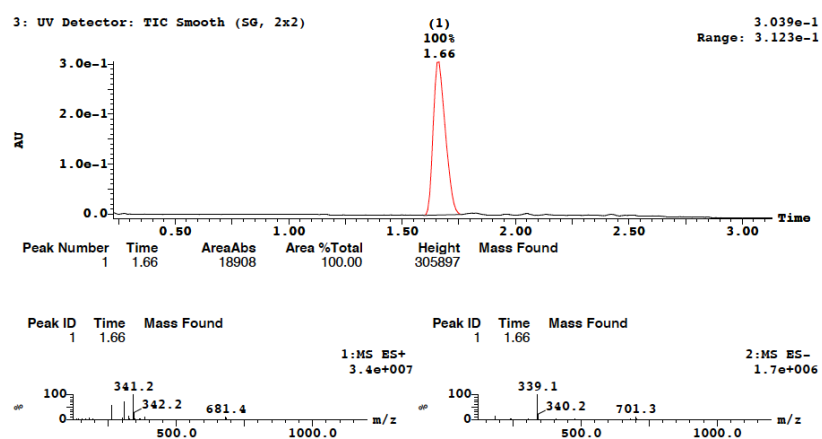

## Compound 23

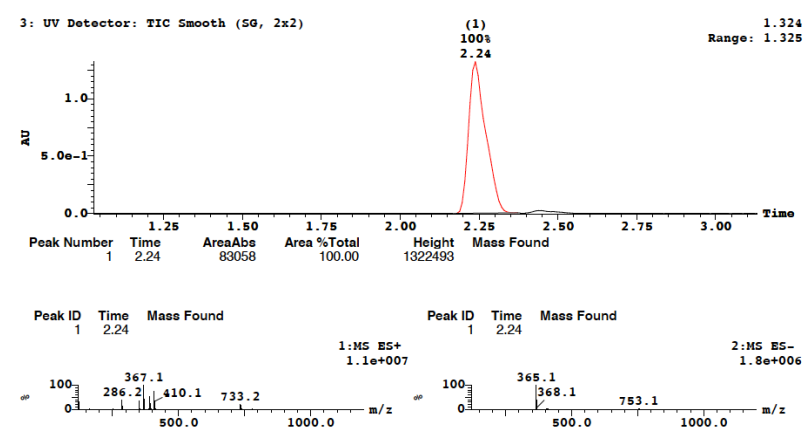



## Compound 24

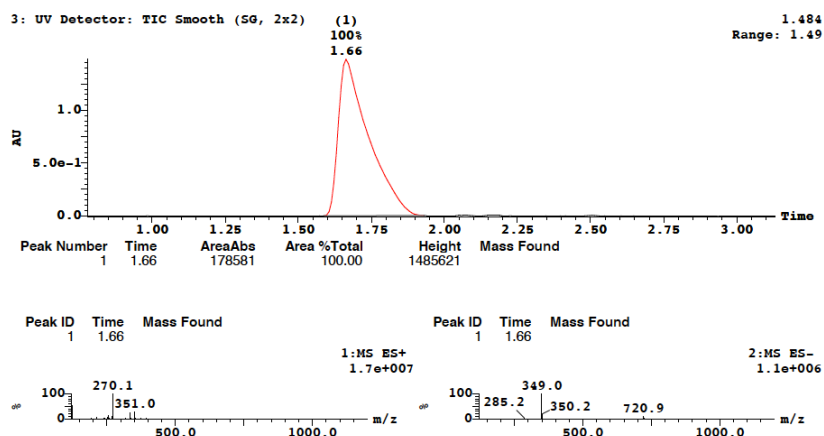

## Compound 25

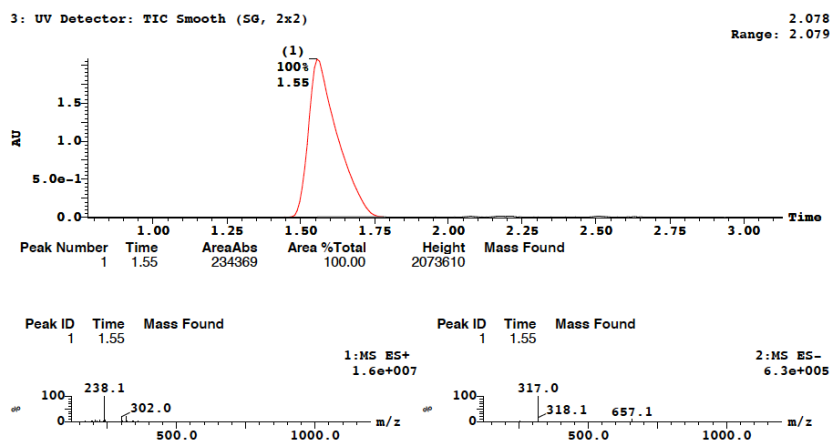

## Compound 26

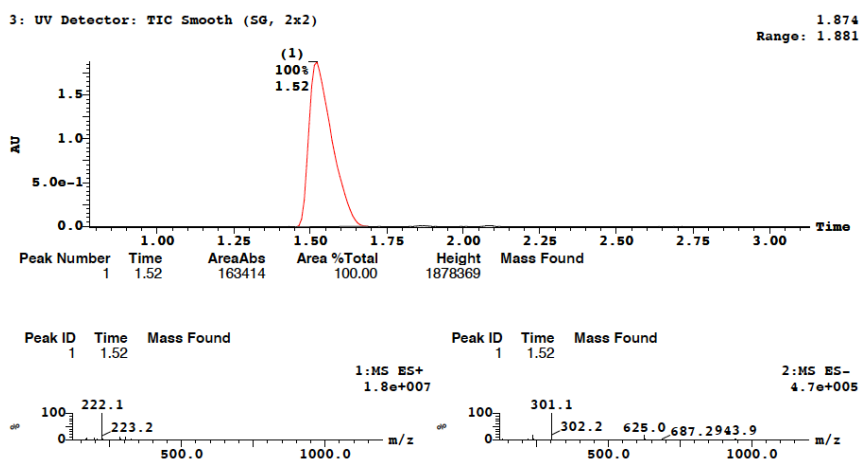

Supplement: jm0c00007_si_001.pdf [file jm0c00007_si_001.pdf]
